# Supplementary material
Source: PubMed Central journal article supplement (PMC1472434)

# A

|            |     |     |     |     |     |     |            |     |     |     |     |     |     |     |     |     |     |     |     |     |     |     |     |     |      |
|------------|-----|-----|-----|-----|-----|-----|------------|-----|-----|-----|-----|-----|-----|-----|-----|-----|-----|-----|-----|-----|-----|-----|-----|-----|------|
| <b>ATG</b> | GCG | TCC | GGT | GGC | CAC | GAG | CGG        | GCC | AAT | GAG | GAT | TAC | AGA | GTC | TCT | GGC | ATT | ACG | GGA | TGC | AGC | AAG | ACT | CCT | 75   |
| M          | A   | S   | G   | G   | H   | E   | R          | A   | N   | E   | D   | Y   | R   | V   | S   | G   | I   | T   | G   | C   | S   | K   | T   | P   | 25   |
| CAG        | CCT | GAG | ACT | CAG | GAC | AGC | TTG        | CAG | ACC | TCA | TCA | CAA | AGC | TCA | GCT | CTC | TGC | ACA | GCT | CCT | GTG | GCT | GCT | GCA | 150  |
| Q          | P   | E   | T   | Q   | D   | S   | L          | Q   | T   | S   | S   | Q   | S   | S   | A   | L   | C   | T   | A   | P   | V   | A   | A   | A   | 50   |
| AAC        | TTG | GGC | CCC | AGT | CTT | CGG | AGA        | AAC | GTG | GTC | AGC | GAG | AGA | GAA | CGC | AGG | AGG | CGG | ATC | TCG | TTG | AGC | TGT | GAG | 225  |
| N          | L   | C   | G   | P   | S   | L   | R          | R   | N   | V   | V   | E   | R   | E   | R   | R   | R   | R   | I   | S   | L   | S   | C   | E   | 75   |
| CAC        | TTG | CGG | GCT | CTA | CTG | CCT | CAG        | TTT | GAT | GGC | CGA | CGG | GAG | GAC | ATG | GCA | TCT | GTC | CTG | GAG | ATG | TCT | GTG | TAC | 300  |
| H          | L   | R   | A   | L   | L   | P   | Q          | F   | D   | G   | R   | R   | E   | D   | M   | A   | S   | V   | L   | E   | M   | S   | V   | Y   | 100  |
| TTC        | CTC | CAG | CTT | GCC | CAC | AGC | ATG        | GAC | CCT | AGC | TGG | GAG | CAA | CTC | TCT | GTT | CCT | CAG | CCT | CCC | CAG | GAG | ATG | TGG | 375  |
| F          | L   | Q   | L   | A   | H   | S   | M          | D   | P   | S   | W   | E   | Q   | L   | S   | V   | P   | Q   | P   | P   | Q   | E   | M   | W   | 125  |
| CAC        | ATG | TGG | CAG | GGT | GAT | GTT | CTG        | CAG | GTA | ACC | CTG | GCG | AAT | CAG | ATT | GCA | GAC | AGC | AAG | CCA | GAC | TCC | GGT | ATA | 450  |
| H          | M   | W   | Q   | G   | D   | V   | L          | Q   | V   | T   | L   | A   | N   | Q   | I   | A   | D   | S   | K   | P   | D   | S   | G   | I   | 150  |
| GCC        | AAA | CCA | TCT | GCT | GTG | TCT | CGG        | GTA | CAG | GAT | CCC | CCA | TGC | TTT | GGG | ATG | CTG | GAT | ACA | GAC | CAG | AGC | CAG | GCT | 525  |
| A          | K   | P   | S   | A   | V   | S   | R          | V   | Q   | D   | P   | P   | C   | F   | G   | M   | L   | D   | T   | D   | Q   | S   | Q   | A   | 175  |
| ACT        | GAG | AGA | GAG | TCA | GAG | CTG | CTG        | GAG | AGA | CCT | TCC | TCC | TGC | CCT | GGT | CAT | CGC | CAG | AGC | GCG | TTG | TCA | TTC | AGT | 600  |
| T          | E   | R   | E   | S   | E   | L   | L          | E   | R   | P   | S   | C   | P   | G   | H   | R   | Q   | S   | A   | L   | S   | F   | S   | 200 |      |
| GAG        | CCA | GAG | TCT | TCC | AGC | TTG | GTT        | GCT | GGG | CTC | CCA | CCC | TGG | ATC | CCT | CAC | TCA | TGG | CAG | CCA | GCC | ACT | CCC | GAG | 675  |
| E          | P   | E   | S   | S   | S   | L   | G          | P   | G   | L   | P   | P   | W   | I   | P   | H   | S   | W   | Q   | P   | A   | T   | P   | E   | 225  |
| GCA        | AGT | GAC | ATT | GTT | CCT | GGT | GGG        | TCA | CAC | CAG | GTG | GCA | TCC | CTG | GCC | GGG | GAC | CCT | GAA | TCT | TCC | GGC | ATG | CTG | 750  |
| A          | S   | D   | I   | V   | P   | G   | G          | S   | H   | Q   | V   | A   | S   | L   | A   | G   | D   | P   | E   | S   | S   | G   | M   | L   | 250  |
| GCT        | GAG | GAG | GCC | AAC | TTG | GTC | TTG        | GCA | TCT | GTG | CCT | GAT | GCC | AGG | TAC | ACC | ACA | GGG | GCA | GGG | TCC | GAT | GTG | GTG | 825  |
| A          | E   | E   | A   | N   | L   | V   | L          | A   | S   | V   | P   | D   | A   | R   | Y   | T   | T   | G   | A   | G   | S   | D   | V   | V   | 275  |
| GAT        | GGA | GCA | CCC | TTT | CTG | ATG | ACC        | ACC | AAT | CCT | GAC | TGG | TGG | TTG | GGG | TCG | GTG | GAG | GGC | AGA | GGA | GGC | CCA | GCC | 900  |
| D          | G   | A   | P   | F   | L   | M   | T          | T   | N   | P   | D   | W   | W   | L   | G   | S   | V   | E   | G   | R   | G   | G   | P   | A   | 300  |
| C TT       | GCC | AGG | AGC | AGC | LCA | GTG | GAT        | GGG | GCA | GAG | CCA | AGC | TTT | ATC | GGA | GAC | CCT | GAG | CTT | TGC | TCC | CAG | GAG | CTC | 975  |
| L          | A   | R   | S   | S   | P   | V   | D          | G   | A   | E   | P   | S   | F   | I   | G   | D   | P   | E   | L   | C   | S   | Q   | E   | L   | 325  |
| CAG        | GCT | GGT | CCT | GGA | GAG | CTG | TGG        | GGT | TTG | GAT | TTT | GGC | AGC | CCT | GGC | CTG | GCC | CTG | AAG | GAT | GAA | GCG | GAC | AGC | 1050 |
| Q          | A   | C   | P   | G   | E   | L   | W          | G   | L   | D   | F   | G   | S   | P   | G   | L   | A   | L   | K   | D   | E   | A   | D   | S   | 350  |
| ATC        | TTC | GCT | GAC | TTT | TTC | CCC | <b>PGA</b> |     |     |     |     |     |     |     |     |     |     |     |     |     |     |     |     |     | 1074 |
| I          | F   | P   | D   | F   | F   | P   | STOP       |     |     |     |     |     |     |     |     |     |     |     |     |     |     |     |     |     | 357  |

# B

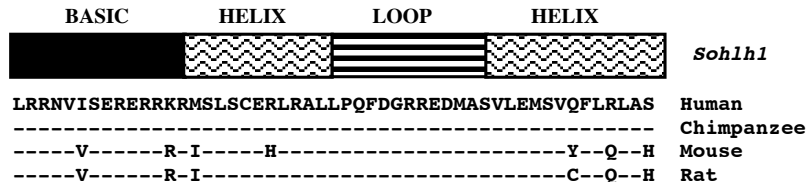

Supplement: pnas_0601083103_1.pdf [file pnas_0601083103_1.pdf]
