# Supplementary material
Source: PubMed Central journal article supplement (PMC1472434)

A

|                                    | E-box1 (+828)                             | E-box2 (+1117)       |
|------------------------------------|-------------------------------------------|----------------------|
| <i>Lhx8</i> E-box                  | Mouse <u>ccgggagcagctg</u> cgccggg        | ttaaattcagctggatattt |
|                                    | Rat <u>ccagaagcggctg</u> cgctggg          | ttaaattcagctggatattt |
|                                    | Human <u>ctcagtgca<u>gctac</u></u> gctggg | ttaaattcagctggatattt |
| <i>Nobox</i> E-box                 | E-box1 (-743)                             | E-box2 (-160)        |
|                                    | Mouse <u>cttgccgcagctg</u> tttcaat        | cccaccccaggtgtgcggtg |
|                                    | Rat <u>ctcacagcagctg</u> tttcaat          | cccaccccaggtgtgcggtg |
| Human <u>ctccaagcacctg</u> tttctat | gctgccccagccgagcctcc                      |                      |
| <i>Zp1</i> E-box                   | E-box (-270)                              |                      |
|                                    | Mouse <u>gtagtcccagctg</u> ccacaga        |                      |
|                                    | Rat <u>gtagtcccagctg</u> ccacaga          |                      |
| Human <u>aaagccacagctg</u> tgagaca |                                           |                      |
| <i>Zp2</i> E-box                   | E-box (-241)                              |                      |
|                                    | Mouse <u>ttgggggcacctg</u> gctctcc        |                      |
|                                    | Human <u>ttgggggcacctg</u> aatcttg        |                      |
| Dog <u>ttggagacacctg</u> agccttc   |                                           |                      |
| <i>Zp3</i> E-box                   | E-box (-205)                              |                      |
|                                    | Mouse <u>taggaatcacgtg</u> gagtgtc        |                      |
|                                    | Rat <u>taggaatcacgtg</u> gggtatc          |                      |
| Human <u>gtggatacacgtg</u> ggggatt |                                           |                      |

B

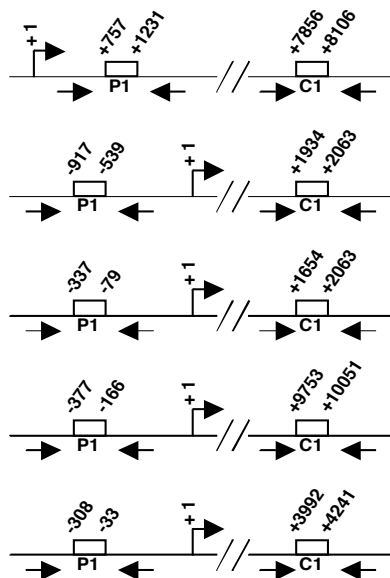

Supplement: pnas_0601083103_5.pdf [file pnas_0601083103_5.pdf]
